# Supplementary material for: Photophysics and charge transfer in oligo(thiophene) based conjugated diblock oligomers
Source: Royal Society of Chemistry journal article supplement (doi:10.1039/d3cp03067a), 2023-01-01
Supplement: d3cp03067a1.pdf [file d3cp03067a1.pdf]

**Electronic Supporting Information**

**Photophysics and Charge Transfer in Oligo(thiophene) Based  
Conjugated Diblock Oligomers**

Habtom B. Gobeze, Pradeepkumar Jagadesan, and Kirk S Schanze\*

University of Texas at San Antonio, Department of Chemistry, One UTSA Circle, San Antonio,

TX 78249.

\* Corresponding author email: [kirk.schanze@utsa.edu](mailto:kirk.schanze@utsa.edu)

## Synthesis and Characterization

Precursors **T4**<sup>1</sup>, **T4-SnBu<sub>3</sub>**<sup>2</sup>, **TBT-Br**<sup>3</sup>, **T4-Br**<sup>4</sup>, **T8**<sup>5</sup>, **T8-Br**<sup>6</sup>, **TBT-SnBu<sub>3</sub>**<sup>7</sup> were synthesized by following reported procedure.

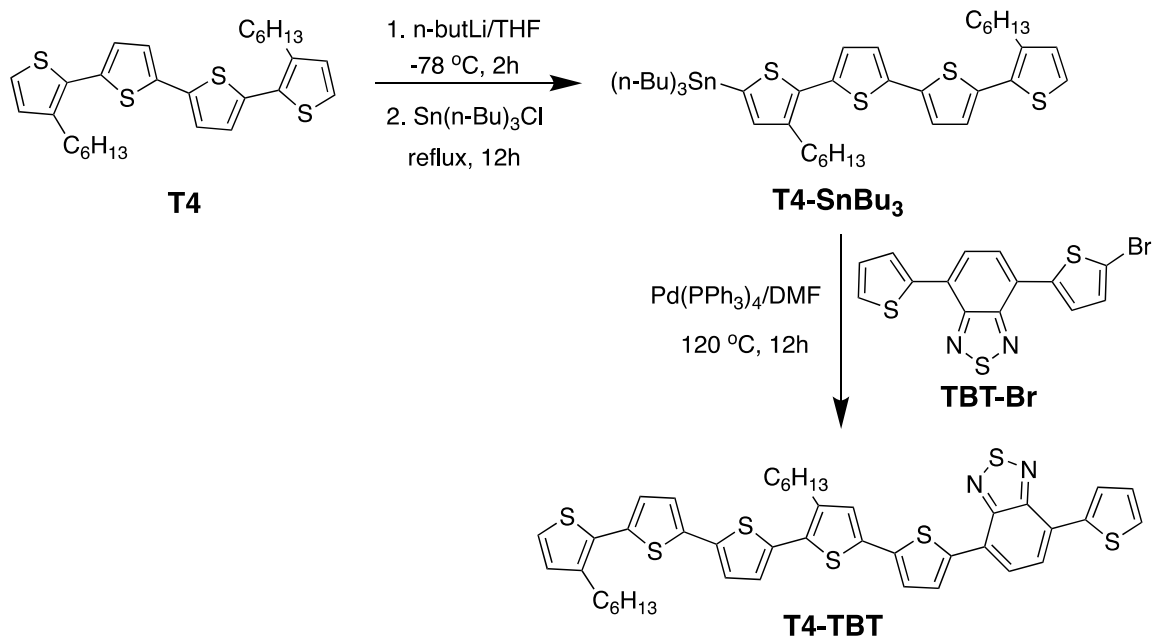

**Scheme S1.** Synthesis of **T4-TBT**.

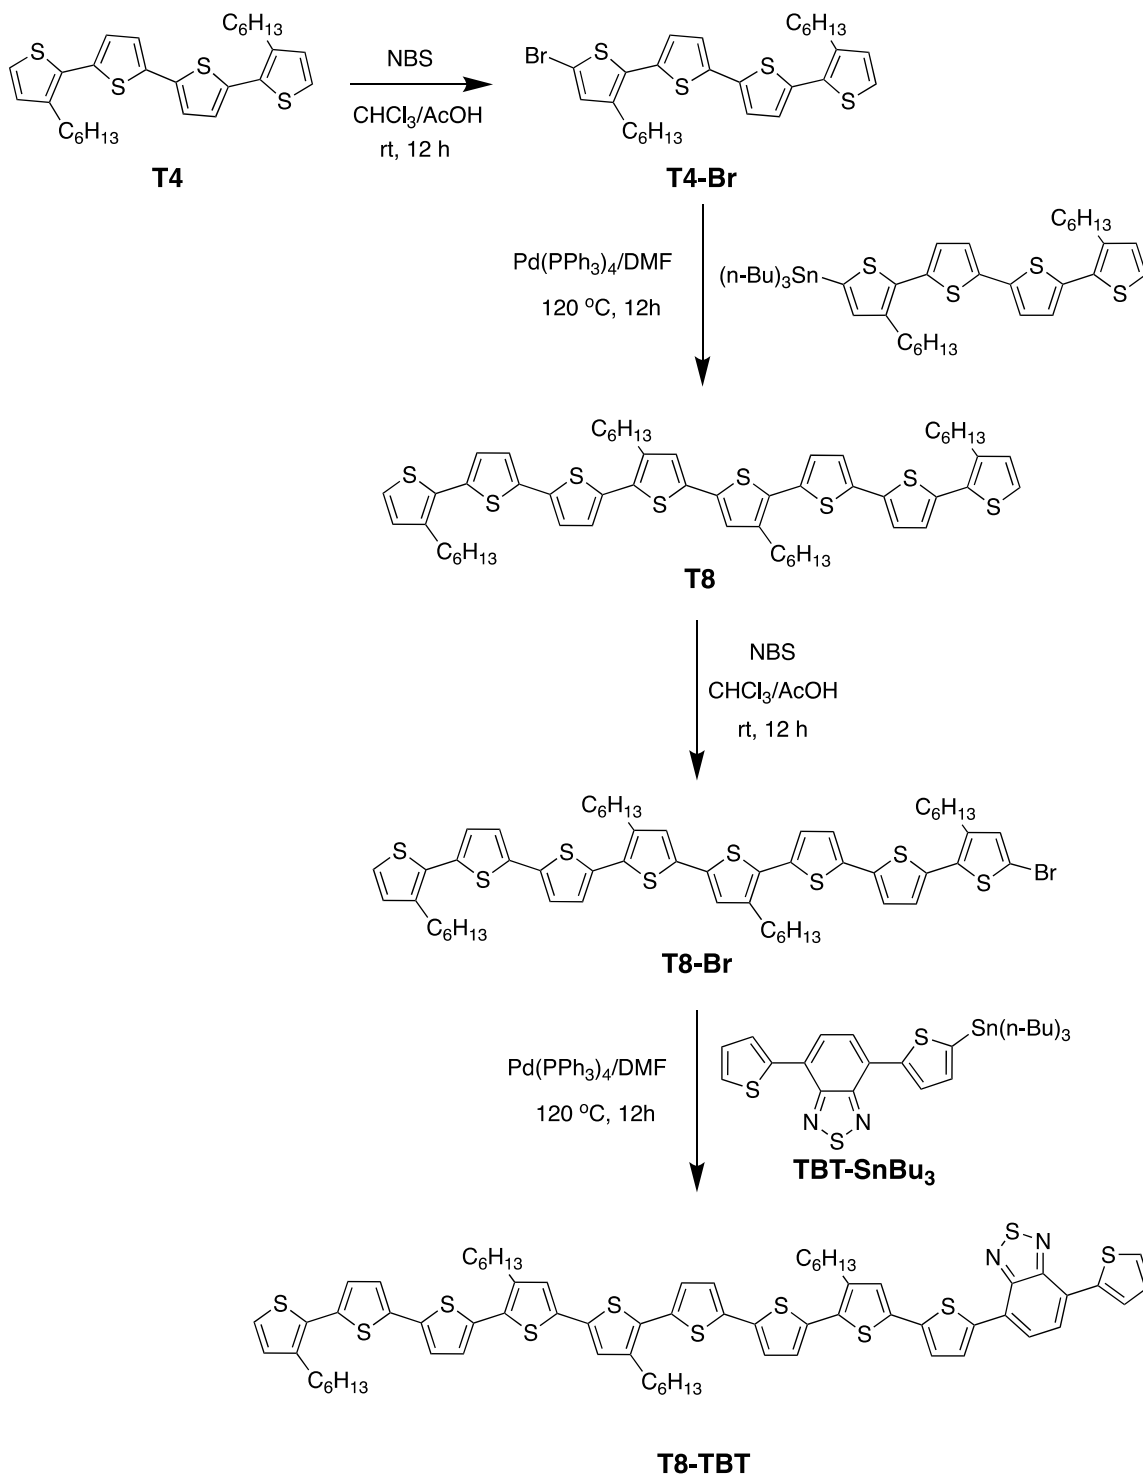

**Scheme S2.** Synthesis of **T8-TBT**.

**Synthesis of T4-TBT:** To a solution of **TBT-Br** (220 mg, 0.316 mmol) and **T4-SnBu<sub>3</sub>** (274 mg, 0.348 mmol) DMF (20 mL) was added Pd(PPh<sub>3</sub>)<sub>4</sub> (38 mg, 0.032 mmol). The reaction mixture was stirred at 120 °C for 12 h and the solvent was evaporated under reduced pressure. The crude product was purified by silica gel column chromatography using hexane/CH<sub>2</sub>Cl<sub>2</sub> as eluent resulting in a wine red color solid (227 mg, 90%).

<sup>1</sup>H NMR (500 MHz, CDCl<sub>3</sub>): δ (ppm) 8.13 (dd, 1H), 8.04 (d, 1H), 7.88 (quartet, 2H), 7.47 (dd, 1H), 7.25 (d, 1H), 7.27 – 7.13 (m, 5H), 7.08 (d, 1H), 7.04 (d, 1H), 6.95 (d, 1H), 2.78 – 2.74 (m, 8H), 1.75 – 1.60 (m, 8H), 1.40 -1.32 (m, 24H), 0.94 – 0.90 (m, 12H); <sup>13</sup>C NMR (125 MHz, CDCl<sub>3</sub>): δ (ppm) 152.63, 152.45, 140.65, 139.90, 139.38, 138.57, 138.04, 136.92, 136.65, 135.47, 134.94, 134.88, 130.30, 130.11, 129.97, 128.25, 128.04, 127.53, 127.02, 126.84, 126.54, 126.42, 125.89, 125.77, 125.58, 125.14, 124.41, 123.92, 123.89, 31.69, 30.65, 30.47, 29.60, 29.31, 29.24, 27.86, 26.86, 22.65, 17.54, 13.63. ESI-MS (m/z) [M]<sup>+</sup> Calculated for C<sub>42</sub>H<sub>40</sub>N<sub>2</sub>S<sub>7</sub> : 796.1230 found: 796.1350.

**Synthesis of T8-TBT:** To a solution of **T8-Br** (75 mg, 0.070 mmol) and **TBT-SnBu<sub>3</sub>** (45 mg, 0.077 mmol) DMF (10 mL) was added Pd(PPh<sub>3</sub>)<sub>4</sub> (8 mg, 0.007 mmol). The reaction mixture was stirred at 120 °C for 12 h and the solvent was evaporated under reduced pressure. The crude product was purified by silica gel column chromatography using hexane/CH<sub>2</sub>Cl<sub>2</sub> as eluent resulting in a brown color solid (77 mg, 85%).

<sup>1</sup>H NMR (500 MHz, CDCl<sub>3</sub>): δ (ppm) 8.08 (dd, 1H), 7.95 (d, 1H), 7.78 (quartet, 2H) 7.43 (d, 1H), 7.26 – 7.09 (m, 8H), 7.02 – 6.94 (m, 7H), 2.78 – 2.74 (m, 8H), 1.75 – 1.60 (m, 8H), 1.40 -1.32 (m, 24H), 0.94 – 0.90 (m, 12H); <sup>13</sup>C NMR (125 MHz, CDCl<sub>3</sub>): δ (ppm) 152.57, 152.38, 140.48, 139.86, 139.38, 138.53, 137.98, 136.70, 135.41, 134.98, 134.80, 130.34, 130.11, 129.99, 129.55, 128.19, 128.00, 127.47, 126.94, 126.76, 126.57, 126.49, 126.25, 126.18, 125.76, 125.68, 125.49, 125.01, 124.35, 123.91, 123.85, 31.73, 31.71, 30.65, 30.42, 29.74, 29.68, 29.62, 29.37, 29.33, 29.26, 22.67, 14.17, 14.14. ESI-MS (m/z) [M]<sup>+</sup> Calculated for C<sub>70</sub>H<sub>72</sub>N<sub>2</sub>S<sub>11</sub>: 1292.2612, found: 1292.2618.

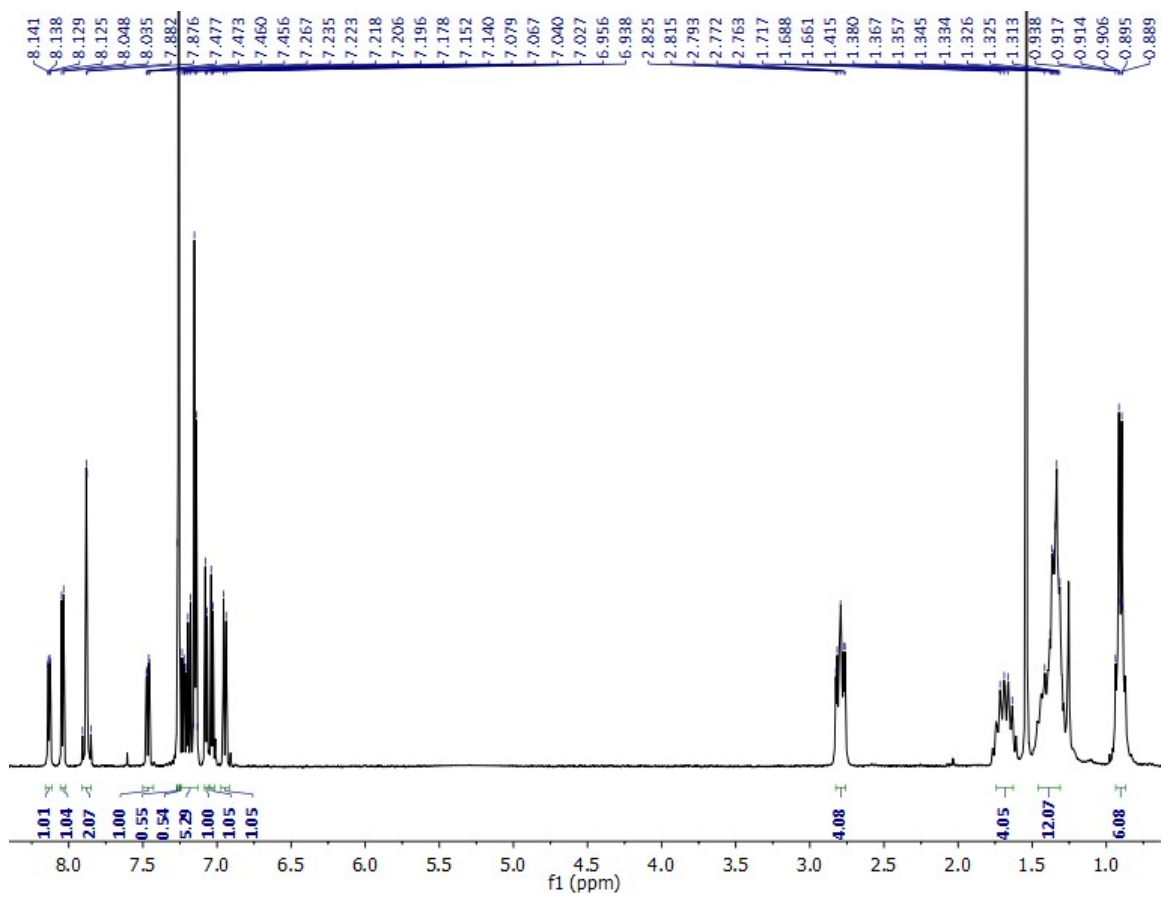

Figure S1. <sup>1</sup>H NMR spectrum (500 MHz, CDCl<sub>3</sub>) of T4-TBT.

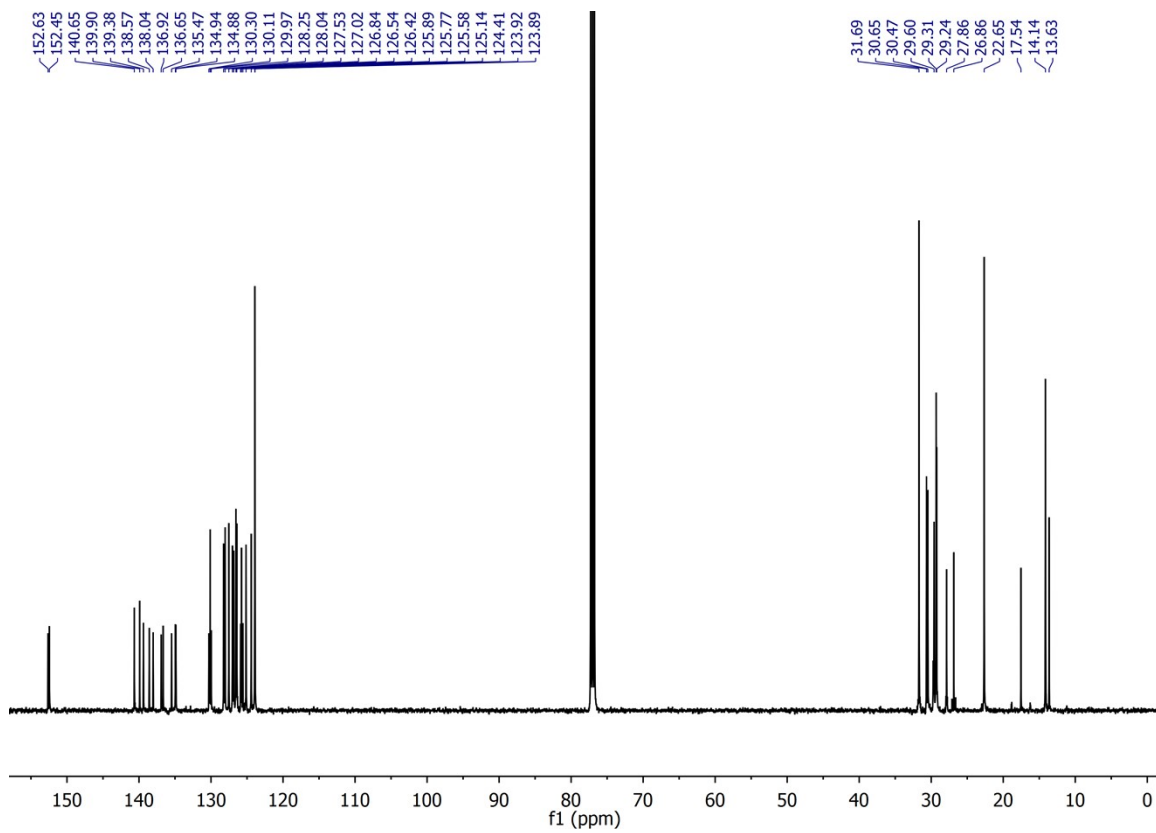

**Figure S2.** <sup>13</sup>C NMR spectrum (125 MHz, CDCl<sub>3</sub>) of T4-TBT.

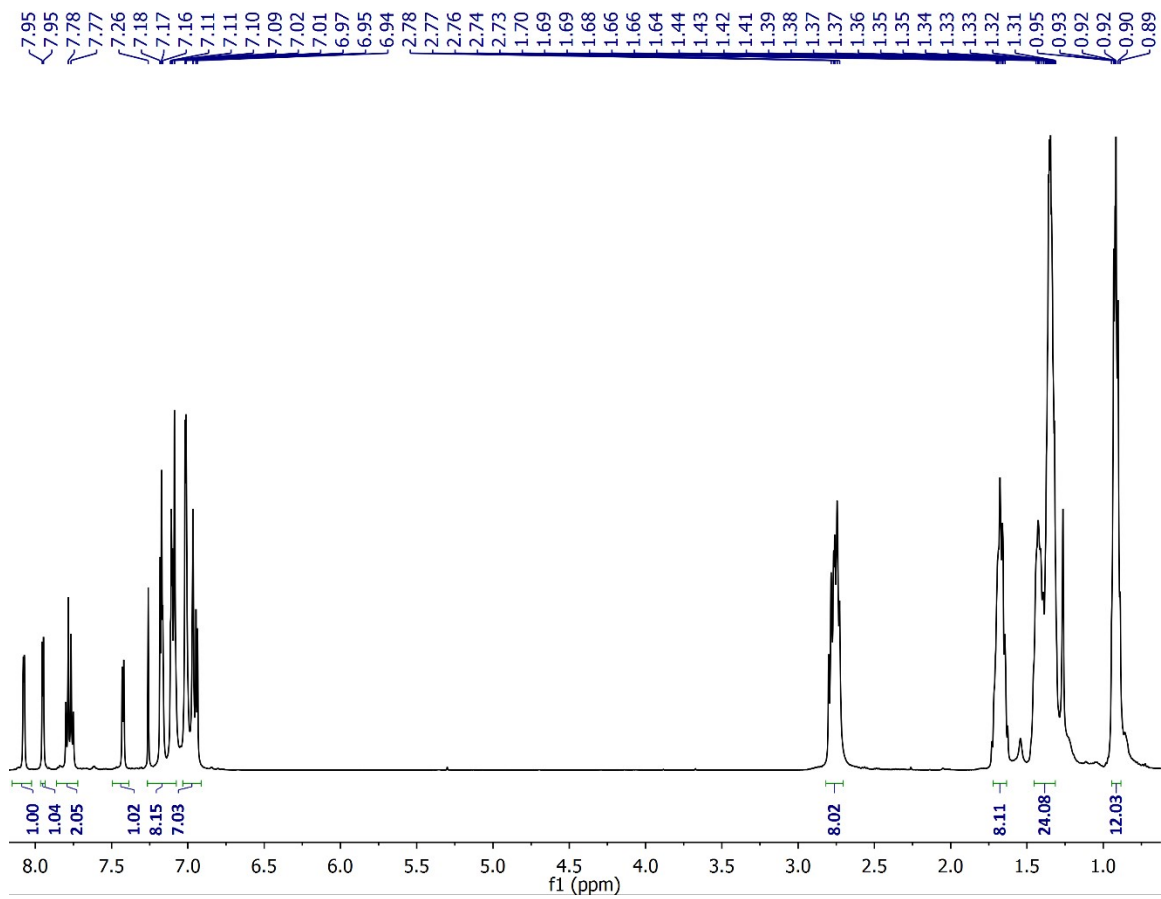

**Figure S3.** <sup>1</sup>H NMR spectrum (500 MHz, CDCl<sub>3</sub>) of T8-TBT.

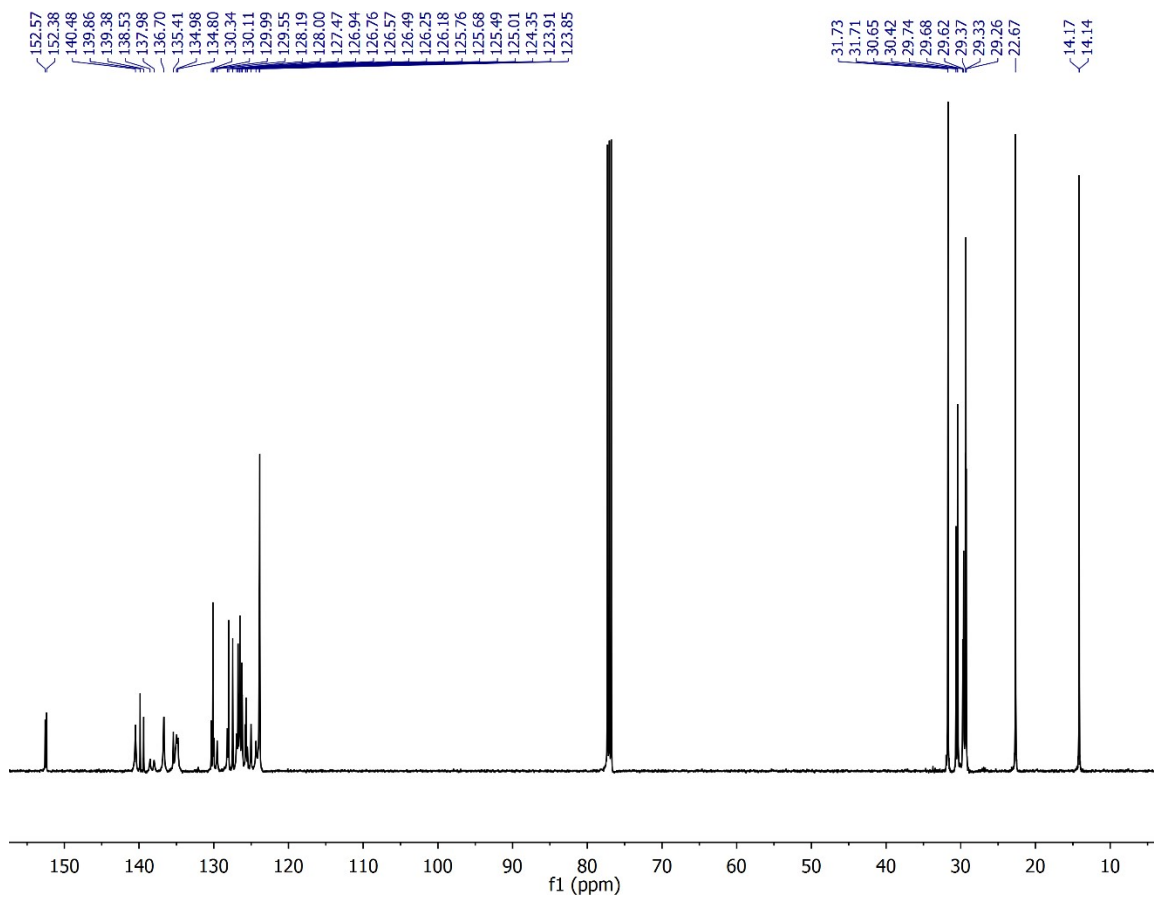

**Figure S4.**  $^{13}\text{C}$  NMR spectrum (125 MHz,  $\text{CDCl}_3$ ) of **T8-TBT**.



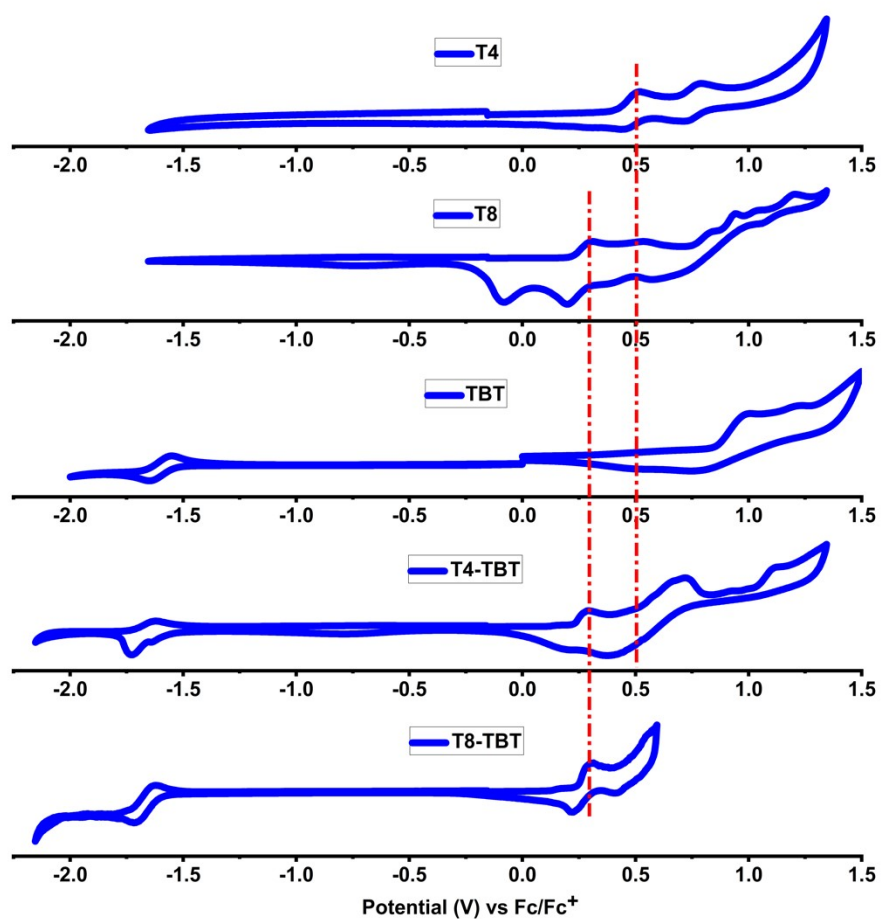

**Figure S5.** Cyclic voltammograms of **T4**, **T8**, **TBT**, **T4-TBT**, and **T8-TBT** in nitrogen saturated dichloromethane with 0.1 M tetrabutyl ammonium hexafluoro phosphate as a supporting electrolyte in a three-electrode set up with glassy carbon (WE), silver/silver chloride (RE), and platinum wire (CE) and a scan rate of 100 mVs<sup>-1</sup>

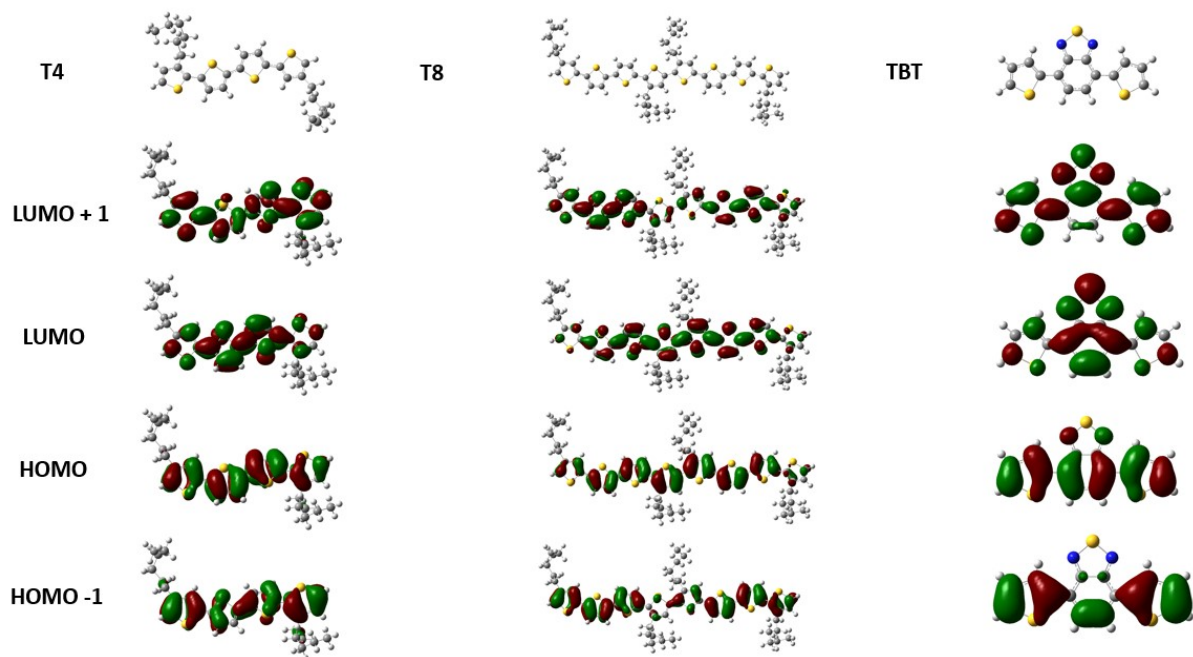

**Figure S6.** HOMO-LUMO frontier orbitals of model compounds **T4**, **T8**, and **TBT**.

**Table S1.** Frontier Energy Level Energies for **T4**, **T8** and **TBT**<sup>a</sup>

| Compound   | LUMO +1 | LUMO   | HOMO   | HOMO -1 |
|------------|---------|--------|--------|---------|
| <b>T4</b>  | - 0.78  | - 1.74 | - 4.98 | - 5.97  |
| <b>T8</b>  | - 1.69  | - 2.05 | - 4.75 | - 5.15  |
| <b>TBT</b> | - 1.08  | - 2.61 | - 5.35 | - 6.59  |

<sup>a</sup> Energies listed in eV relative to vacuum level.

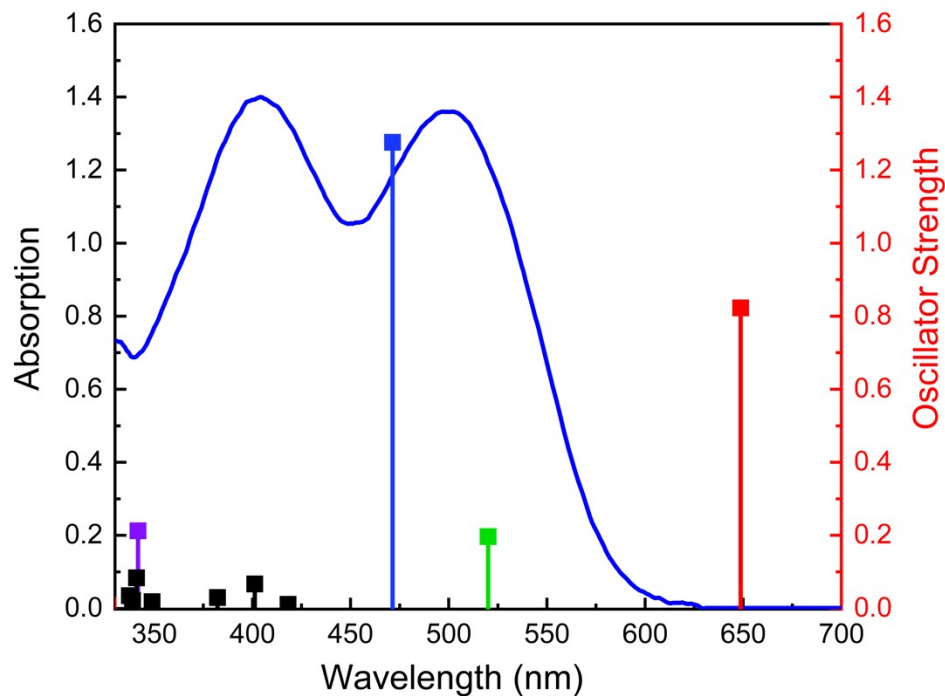

**Figure S7.** Experimentally measured UV-vis spectra (blue) in hexane and TDDFT calculated transitions (symbol and lines) for **T4-TBT**

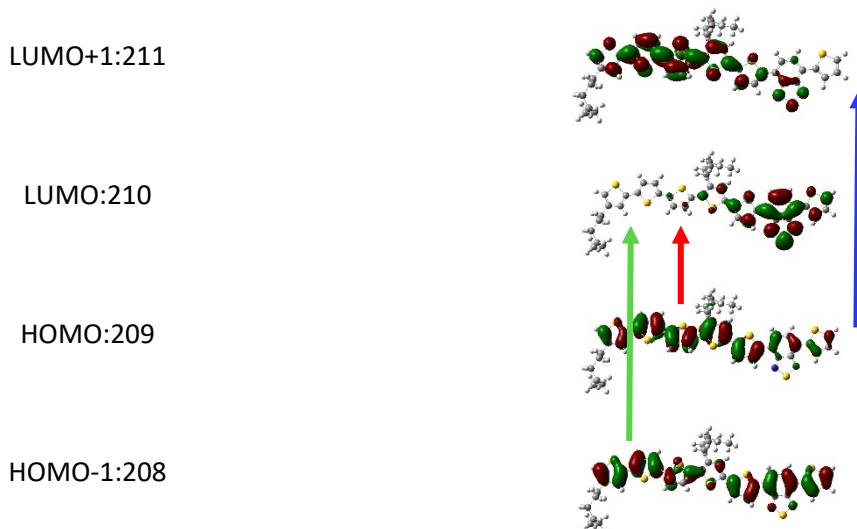

**Figure S8.** Frontier molecular orbitals (HOMO and LUMO) of **T4-TBT**. Lines show major transitions with oscillator strength higher than 0.15.

**Table S2.** Table of transitions for **T4-TBT**. Major transitions with oscillator strength higher than **0.15** are shown in color (bold)

| Excited State | Excitation transitions | Energy (eV) | Wavelength (nm) | Oscillator strength (f) |
|---------------|------------------------|-------------|-----------------|-------------------------|
| 1             | 209 ->210              | 0.69962     | 1.9113          | <b>0.8224</b>           |
| 2             | 208 ->210              | 0.68703     | 2.3840          | <b>0.1964</b>           |
| 3             | 209 ->211              | 0.68882     | 2.6301          | <b>1.2760</b>           |
| 4             | 207 ->210              | 0.67716     | 2.9651          | 0.0110                  |
| 5             | 208 ->211              | 0.53864     | 3.0902          | 0.0670                  |
|               | 209 ->212              | -0.44195    |                 |                         |
| 6             | 208 ->211              | 0.42573     | 3.2436          | 0.0299                  |
|               | 209 ->212              | 0.51751     |                 |                         |
| 7             | 205 ->210              | 0.16898     | 3.5536          | 0.0186                  |
|               | 206 ->210              | 0.62436     |                 |                         |
|               | 208 ->212              | -0.17512    |                 |                         |
| 8             | 201 ->210              | -0.20796    | 3.6284          | <b>0.2125</b>           |
|               | 203 ->210              | 0.12114     |                 |                         |
|               | 204 ->210              | -0.35558    |                 |                         |
|               | 206 ->210              | 0.11802     |                 |                         |
|               | 207 ->211              | 0.22771     |                 |                         |
|               | 208 ->212              | 0.39323     |                 |                         |
|               | 209 ->213              | 0.26845     |                 |                         |
| 9             | 201 ->210              | 0.13220     | 3.6360          | 0.0836                  |
|               | 203 ->210              | 0.21422     |                 |                         |
|               | 204 ->210              | 0.27850     |                 |                         |
|               | 206 ->210              | 0.13208     |                 |                         |
|               | 207 ->211              | -0.11090    |                 |                         |
|               | 208 ->212              | 0.46654     |                 |                         |
|               | 209 ->213              | -0.28403    |                 |                         |
|               | 209 ->214              | 0.10833     |                 |                         |
| 10            | 203 ->210              | 0.59834     | 3.6576          | 0.0220                  |
|               | 204 ->210              | 0.18031     |                 |                         |
|               | 207 ->211              | 0.10375     |                 |                         |
|               | 208 ->212              | -0.22041    |                 |                         |
|               | 209 ->213              | 0.19703     |                 |                         |
| 11            | 201 ->210              | 0.16371     | 3.6752          | 0.0348                  |
|               | 203 ->210              | -0.25127    |                 |                         |
|               | 204 ->210              | 0.40621     |                 |                         |
|               | 207 ->211              | 0.36223     |                 |                         |
|               | 208 ->212              | 0.10076     |                 |                         |

|    |           |          |        |        |        |
|----|-----------|----------|--------|--------|--------|
|    | 209 ->213 | 0.28854  |        |        |        |
| 12 | 201 ->210 | 0.51064  | 3.7975 | 326.49 | 0.0086 |
|    | 204 ->210 | -0.25974 |        |        |        |
|    | 205 ->210 | -0.24937 |        |        |        |
|    | 206 ->210 | 0.15018  |        |        |        |
|    | 207 ->211 | 0.19053  |        |        |        |
|    | 209 ->213 | -0.11304 |        |        |        |
|    | 209 ->214 | -0.11754 |        |        |        |
| 13 | 205 ->210 | 0.43407  | 3.8236 | 324.26 | 0.0397 |
|    | 206 ->210 | -0.10209 |        |        |        |
|    | 207 ->211 | 0.37663  |        |        |        |
|    | 209 ->213 | -0.34250 |        |        |        |
| 14 | 201 ->210 | 0.33427  | 3.8397 | 322.90 | 0.0255 |
|    | 204 ->210 | -0.12982 |        |        |        |
|    | 205 ->210 | 0.45071  |        |        |        |
|    | 207 ->211 | -0.25899 |        |        |        |
|    | 209 ->213 | 0.25297  |        |        |        |
| 15 | 202 ->210 | -0.19890 | 3.9550 | 313.49 | 0.0060 |
|    | 206 ->211 | 0.17124  |        |        |        |
|    | 207 ->211 | 0.15866  |        |        |        |
|    | 207 ->212 | 0.10461  |        |        |        |
|    | 209 ->214 | 0.57737  |        |        |        |
| 16 | 200 ->210 | -0.12130 | 4.0106 | 309.14 | 0.0032 |
|    | 202 ->210 | 0.64941  |        |        |        |
|    | 209 ->214 | 0.18323  |        |        |        |
| 17 | 198 ->210 | -0.10263 | 4.1144 | 301.34 | 0.0110 |
|    | 199 ->210 | 0.46428  |        |        |        |
|    | 200 ->210 | 0.44102  |        |        |        |
|    | 209 ->215 | -0.15507 |        |        |        |
| 18 | 198 ->210 | 0.25231  | 4.1560 | 298.32 | 0.0567 |
|    | 207 ->212 | 0.10836  |        |        |        |
|    | 208 ->213 | 0.59735  |        |        |        |
|    | 209 ->214 | -0.10643 |        |        |        |
| 19 | 198 ->210 | 0.25025  | 4.1944 | 295.59 | 0.0145 |
|    | 199 ->210 | -0.26868 |        |        |        |
|    | 200 ->210 | 0.45642  |        |        |        |
|    | 202 ->210 | 0.11935  |        |        |        |
|    | 206 ->211 | -0.12095 |        |        |        |
|    | 208 ->213 | -0.15217 |        |        |        |
|    | 208 ->214 | 0.13704  |        |        |        |
|    | 209 ->215 | 0.21220  |        |        |        |

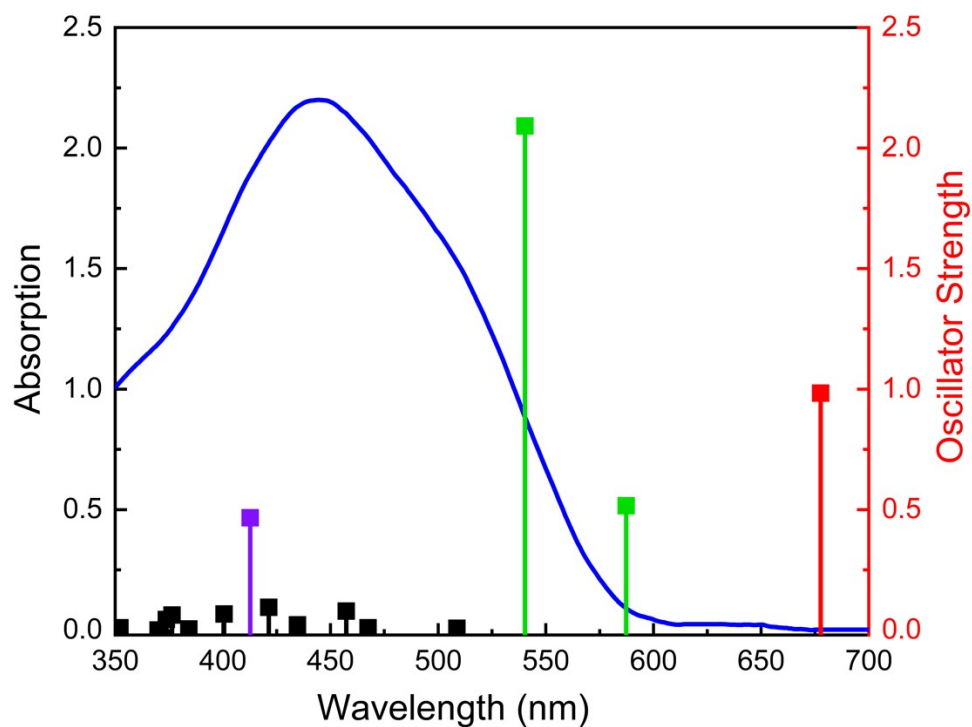

**Figure S9.** Experimentally measured UV-vis spectra (blue) in hexane and TDDFT calculated transitions (symbol and lines) for **T8-TBT**

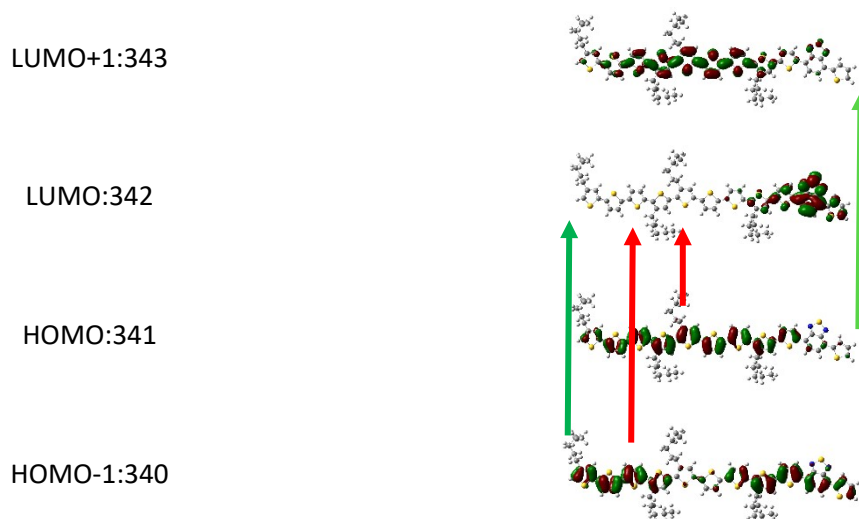

**Figure S10.** Frontier molecular orbitals (HOMO and LUMO) of **T8-TBT**. Lines show major transitions with oscillator strength higher than 0.15.

**Table S3.** Table of transitions for **T8-TBT**. Major transitions with oscillator strength higher than **0.15** are shown in color (bold)

| Excited State | Excitation transitions | Energy (eV) | Wavelength (nm) | Oscillator strength (f) |
|---------------|------------------------|-------------|-----------------|-------------------------|
| 1             | 340 -> 342             | 0.69962     | <b>677.66</b>   | <b>0.9836</b>           |
|               | 341 -> 342             | 0.67518     |                 |                         |
| 2             | 339 -> 342             | 0.14381     | <b>587.34</b>   | <b>0.5162</b>           |
|               | 340 -> 342             | 0.64742     |                 |                         |
|               | 341 -> 342             | 0.20012     |                 |                         |
|               | 341 -> 343             | 0.11942     |                 |                         |
| 3             | 340 -> 342             | -0.14960    | <b>540.35</b>   | <b>2.0912</b>           |
|               | 340 -> 344             | -0.13127    |                 |                         |
|               | 341 -> 343             | 0.67189     |                 |                         |
| 4             | 338 -> 342             | 0.10139     | 508.73          | 0.0075                  |
|               | 339 -> 342             | 0.67323     |                 |                         |
|               | 340 -> 342             | -0.13852    |                 |                         |
| 5             | 340 -> 343             | 0.64878     | 467.47          | 0.0102                  |
|               | 341 -> 344             | 0.24058     |                 |                         |
| 6             | 340 -> 343             | -0.23617    | 457.33          | 0.0789                  |
|               | 340 -> 345             | 0.10084     |                 |                         |
|               | 341 -> 344             | 0.64157     |                 |                         |
| 7             | 337 -> 342             | -0.16022    | 434.70          | 0.0219                  |
|               | 338 -> 342             | 0.65645     |                 |                         |
| 8             | 339 -> 343             | 0.54227     | 421.38          | 0.0951                  |
|               | 340 -> 344             | -0.11149    |                 |                         |
|               | 341 -> 345             | -0.41153    |                 |                         |
| 9             | 340 -> 344             | 0.64026     | <b>412.74</b>   | <b>0.4660</b>           |
|               | 341 -> 343             | 0.13306     |                 |                         |
|               | 341 -> 345             | -0.22897    |                 |                         |
| 10            | 337 -> 342             | 0.11404     | 400.58          | 0.0670                  |
|               | 339 -> 343             | 0.42185     |                 |                         |
|               | 340 -> 344             | 0.16897     |                 |                         |
|               | 341 -> 345             | 0.48413     |                 |                         |
| 11            | 336 -> 342             | 0.14925     | 384.26          | 0.0047                  |
|               | 337 -> 342             | 0.60676     |                 |                         |
|               | 338 -> 342             | 0.14398     |                 |                         |
|               | 340 -> 345             | -0.17974    |                 |                         |
|               | 341 -> 345             | -0.12047    |                 |                         |
| 12            | 337 -> 342             | 0.12671     | 376.45          | 0.0626                  |
|               | 338 -> 343             | 0.17440     |                 |                         |
|               | 339 -> 344             | 0.45766     |                 |                         |
|               | 340 -> 345             | 0.38260     |                 |                         |
|               | 341 -> 346             | 0.25371     |                 |                         |
| 13            | 337 -> 342             | 0.16244     | 373.82          | 0.0443                  |
|               | 338 -> 343             | 0.10176     |                 |                         |

|    |            |          |        |               |               |
|----|------------|----------|--------|---------------|---------------|
|    | 339 -> 344 | -0.41696 |        |               |               |
|    | 340 -> 345 | 0.48181  |        |               |               |
|    | 341 -> 346 | -0.13022 |        |               |               |
| 14 | 338 -> 343 | 0.43978  | 3.3517 | 369.91        | 0.0004        |
|    | 339 -> 344 | -0.24155 |        |               |               |
|    | 340 -> 345 | -0.19630 |        |               |               |
|    | 341 -> 346 | 0.40963  |        |               |               |
| 15 | 338 -> 343 | 0.48312  | 3.5202 | 352.20        | 0.0098        |
|    | 339 -> 344 | 0.13500  |        |               |               |
|    | 341 -> 346 | -0.44511 |        |               |               |
| 16 | 331 -> 342 | -0.15926 | 3.6078 | <b>343.65</b> | <b>0.2050</b> |
|    | 336 -> 342 | -0.23509 |        |               |               |
|    | 339 -> 345 | 0.59043  |        |               |               |
| 17 | 333 -> 342 | -0.27994 | 3.6240 | 342.12        | 0.0134        |
|    | 336 -> 342 | 0.11734  |        |               |               |
|    | 337 -> 343 | 0.18974  |        |               |               |
|    | 338 -> 344 | -0.22888 |        |               |               |
|    | 339 -> 345 | 0.12136  |        |               |               |
|    | 340 -> 346 | 0.33262  |        |               |               |
|    | 341 -> 347 | 0.34634  |        |               |               |
|    | 341 -> 348 | -0.14380 |        |               |               |
| 18 | 328 -> 342 | 0.11151  | 3.6438 | 340.26        | 0.0655        |
|    | 329 -> 342 | 0.16449  |        |               |               |
|    | 331 -> 342 | 0.25215  |        |               |               |
|    | 333 -> 342 | 0.26880  |        |               |               |
|    | 335 -> 342 | -0.12203 |        |               |               |
|    | 336 -> 342 | 0.42957  |        |               |               |
|    | 337 -> 342 | -0.13089 |        |               |               |
|    | 339 -> 345 | 0.27631  |        |               |               |
| 19 | 329 -> 342 | -0.10587 | 3.6566 | 339.07        | 0.0005        |
|    | 331 -> 342 | 0.58004  |        |               |               |
|    | 333 -> 342 | 0.13549  |        |               |               |
|    | 336 -> 342 | -0.28905 |        |               |               |
| 20 | 328 -> 342 | 0.10166  | 3.6710 | 337.74        | 0.0226        |
|    | 329 -> 342 | 0.13190  |        |               |               |
|    | 331 -> 342 | -0.21817 |        |               |               |
|    | 333 -> 342 | 0.47234  |        |               |               |
|    | 336 -> 342 | -0.12709 |        |               |               |
|    | 337 -> 343 | 0.16745  |        |               |               |
|    | 338 -> 344 | -0.17854 |        |               |               |
|    | 339 -> 345 | -0.12149 |        |               |               |
|    | 341 -> 346 | -0.10122 |        |               |               |
|    | 341 -> 347 | 0.23560  |        |               |               |



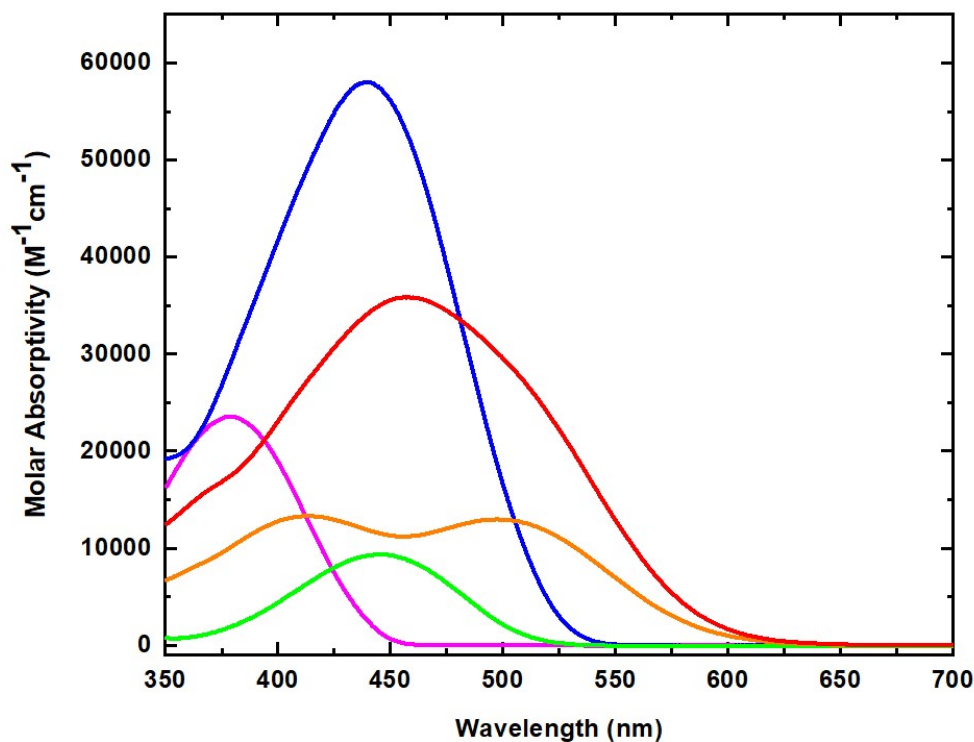

**Figure S11.** UV-vis absorption spectra as a function of molar extinction coefficient measured in dichloromethane of **T4** (magenta), **T8** (blue), **TBT** (green), **T4-TBT** (orange), and **T8-TBT** (red).

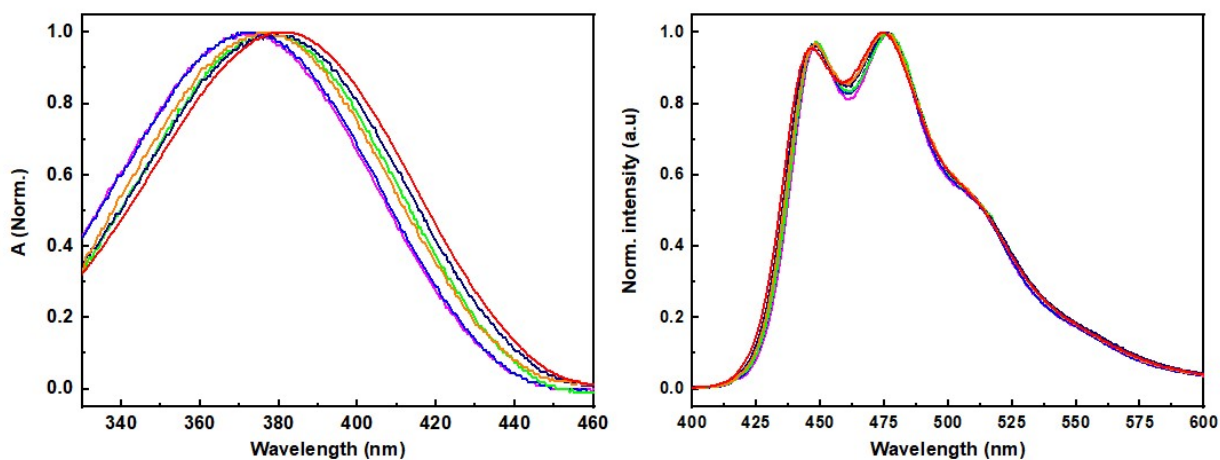

**Figure S12.** UV-vis absorption Spectra (left) and fluorescence emission (right) of **T4** in hexane (magenta), diethyl ether (blue), tetrahydrofuran (green), dichloromethane (navy), acetone (orange), and dimethyl formamide (red).

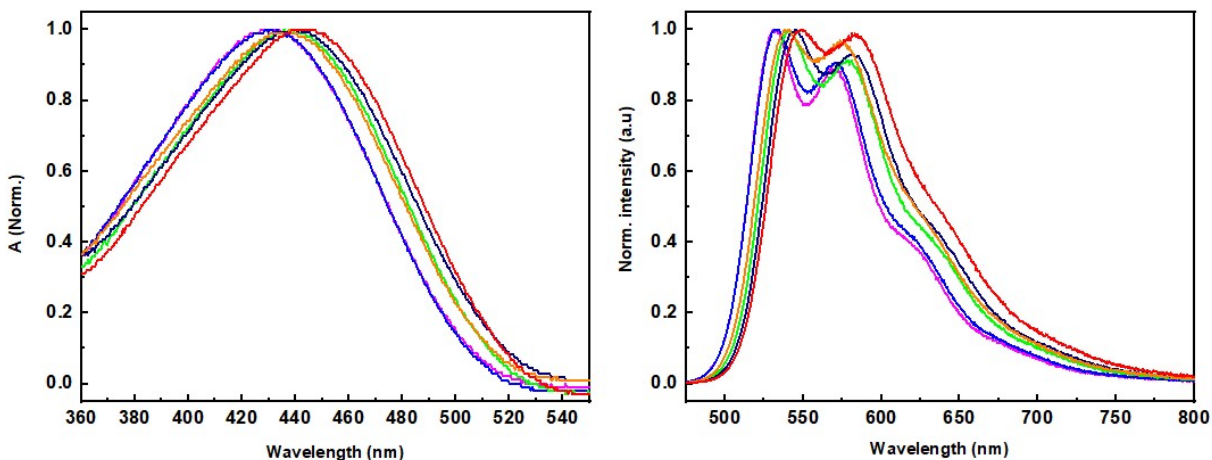

**Figure S13.** UV-vis absorption Spectra (left) and fluorescence emission (right) of **T8** in hexane (magenta), diethyl ether (blue), tetrahydrofuran (green), dichloromethane (navy), acetone (orange), and dimethyl formamide (red).

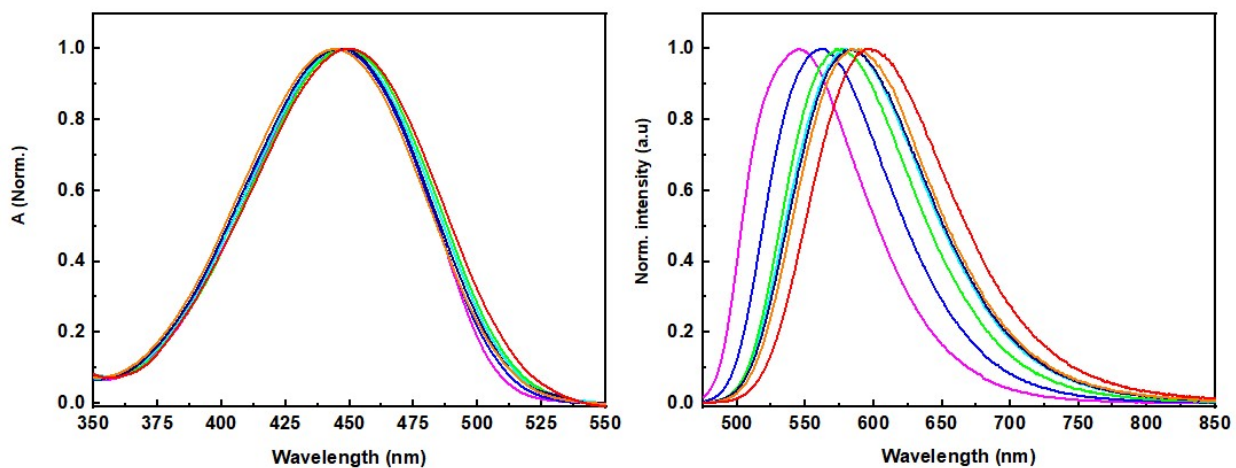

**Figure S14.** UV-vis absorption spectra (left) and fluorescence emission (right) of **TBT** in hexane (magenta), diethyl ether (blue), chloroform (cyan), tetrahydrofuran (green), dichloromethane (navy), acetone (orange), and dimethyl formamide (red).

## Lippert-Mataga Plots

The Lippert-Mataga equation correlates the observed Stokes shift ( $\Delta\nu$ ) with the orientational polarizability of each of the molecules in the solvent medium, where  $\nu_a$  and  $\nu_e$  are the absorption and fluorescence maxima energies, respectively,  $h$  is the Planck constant,  $c$  is the light speed,  $r$  is the molecular Onsager radius,  $\Delta\mu$  is the dipole moment difference between the ground and excited states. The term  $\frac{2(\Delta\mu)_2}{hc r^3}$  is the slope of the plot of  $f(\epsilon, n)$  vs  $\Delta\nu$ , and  $\Delta\mu$  is obtained from the slope using the molecular Onsager radius and the physical constants  $h$  and  $c$ .

$$\Delta\nu = \nu_a - \nu_e = \frac{2(\Delta\mu)_2}{hc r^3} f(\epsilon, n) + C \quad (S1)$$

$$f(\epsilon, n) = \left( \frac{\epsilon - 1}{2\epsilon + 1} - \frac{n^2 - 1}{2n^2 + 1} \right) \quad (S2)$$

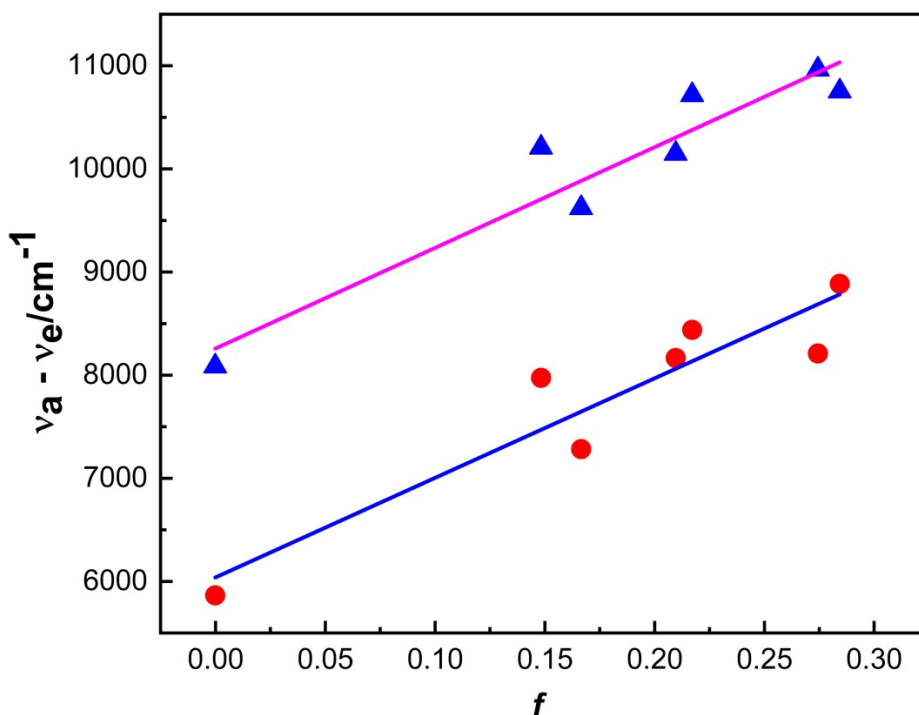

**Figure S15.** Lippert-Mataga plots of fluorescence data for **T4-TBT** and **T8-TBT** according to eqs. S1 and S2. (□): **T4-TBT**. (●): **T8-TBT**. Solid lines are least squares fits of the data.

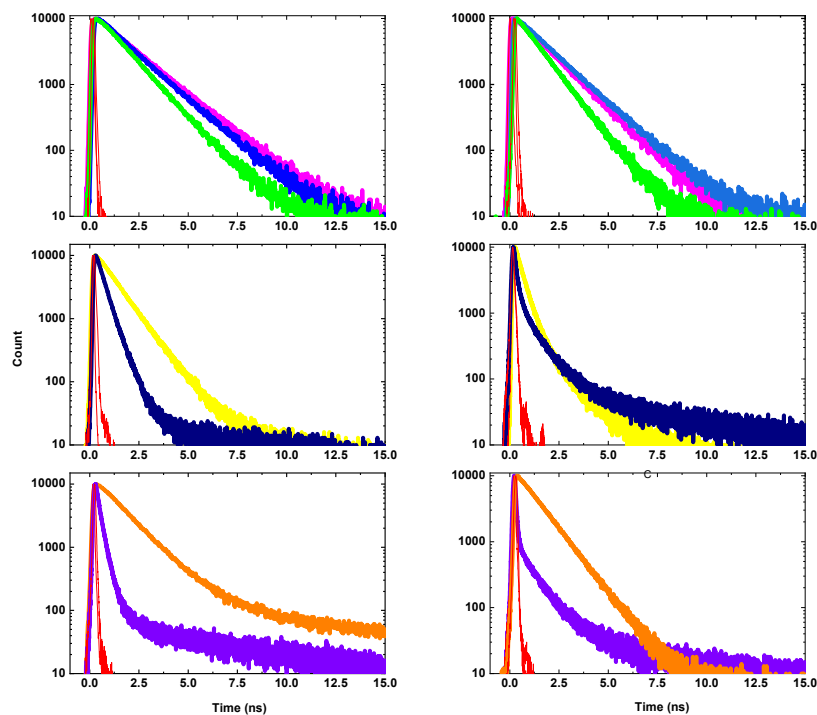

**Figure S16.** Fluorescence emission decays of **T4-TBT** (left column) and **T8-TBT** (right column) in different solvents: hexane (magenta), diethyl ether (blue), chloroform (green), dichloromethane (yellow), acetone (navy), tetrahydrofuran (orange), and dimethyl formamide (violet)

**Table S4. Rates of radiative and non-radiative processes <sup>a</sup>**

| Solvent      | T4-TBT      |                                |                                   | T8-TBT      |                                |                                   |
|--------------|-------------|--------------------------------|-----------------------------------|-------------|--------------------------------|-----------------------------------|
|              | $\tau$ / ns | $k_r$ / $10^8$ s <sup>-1</sup> | $k_{nr}$ / $10^8$ s <sup>-1</sup> | $\tau$ / ns | $k_r$ / $10^8$ s <sup>-1</sup> | $k_{nr}$ / $10^8$ s <sup>-1</sup> |
| <b>Hex</b>   | 1.8         | 1.9                            | 3.4                               | 1.5         | 2.6                            | 4.1                               |
| <b>Et2O</b>  | 1.6         | 1.6                            | 4.7                               | 1.5         | 1.7                            | 5.0                               |
| <b>THF</b>   | 1.63        | 1.1                            | 5.0                               | 1.1         | 1.3                            | 7.8                               |
| <b>CHCl3</b> | 1.3         | 1.2                            | 6.5                               | 1.1         | 1.3                            | 7.8                               |
| <b>DCM</b>   | 1.3         | 0.77                           | 6.9                               | 0.55        | 0.54                           | 17.6                              |
| <b>Ace</b>   | 0.42        | 0.71                           | 23                                | 0.52        | 0.20                           | 19                                |
| <b>DMF</b>   | 0.23        | 3.9                            | 39.6                              | 0.23        | 0.09                           | 43.4                              |

<sup>a</sup> Calculated according to the expressions  $k_{nr} = 1/\tau$  and  $k_r = \phi_{em}/\tau$  and  $k_{nr} = k_r(1/\phi_{em} - 1)$  (see Table 2 in text for data). Median fluorescence lifetimes used when decays were biexponential. Median lifetimes calculated by using the following equation:  $\langle\tau\rangle = \sum\alpha_i\tau_i$  where  $\alpha_i$  and  $\tau_i$  are the normalized amplitude and lifetime for the decay components.

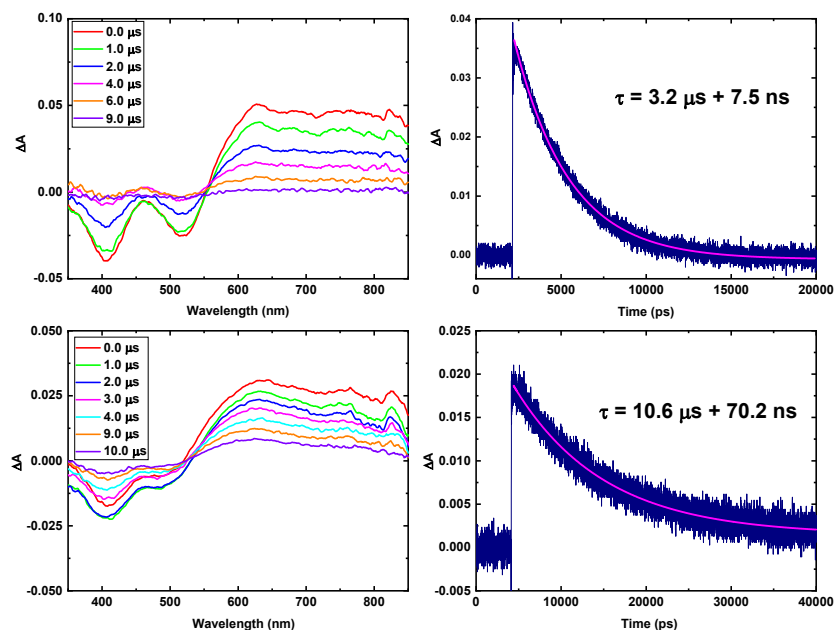

**Figure S17.** Nanosecond transient absorption of T4-TBT ( $\lambda_{\text{ex}} = 410 \text{ nm}$ , 4 mJ/pulse, 5 ns fwhm) in hexane (top) and dichloromethane (bottom) along with time profile kinetic fit at 630 nm for both hexane and dichloromethane.

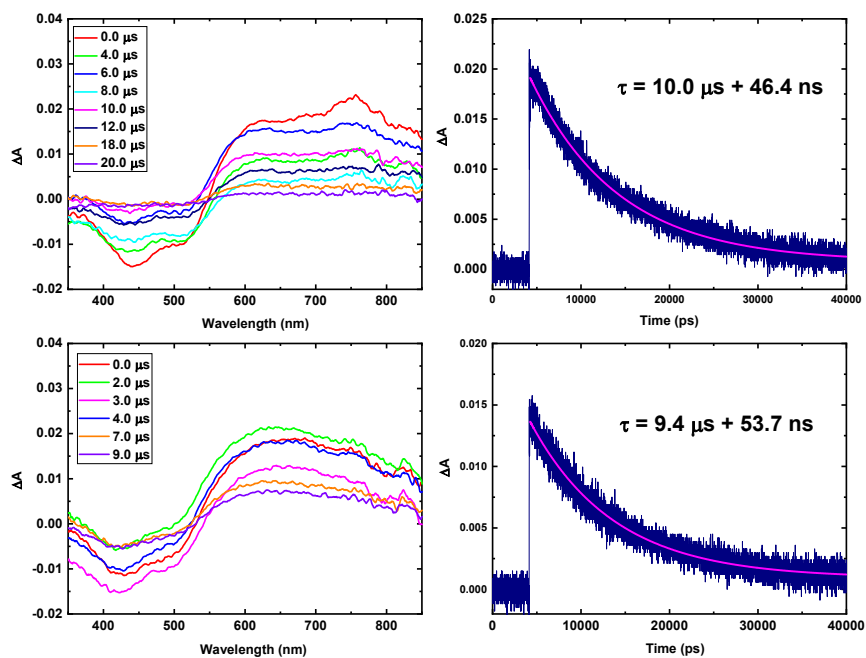

**Figure S18.** Nanosecond transient absorption of T8-TBT ( $\lambda_{\text{ex}} = 410 \text{ nm}$ , 4 mJ/pulse, 5 ns fwhm) in hexane (top) and dichloromethane (bottom) along with the decay profile at 615 nm and 640 nm.

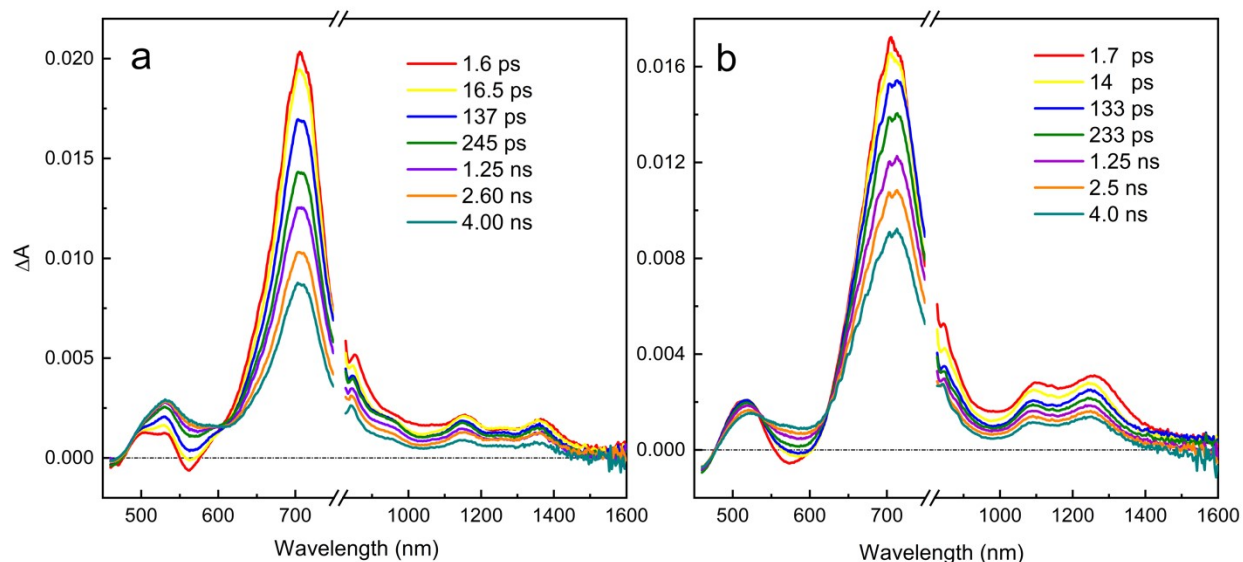

**Figure S19.** Femtosecond TA spectra of TBT in hexane (a) and in dichloromethane (b) at excitation wavelength of 450 nm.

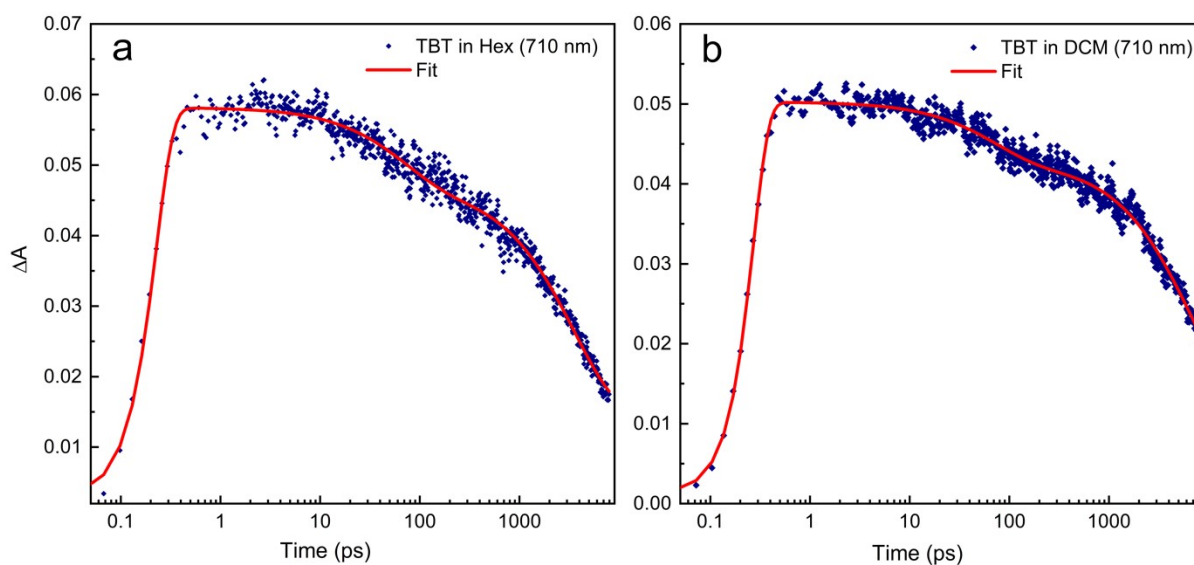

**Figure S20.** Decay traces at 710 nm with exponential fits for TBT in hexane (a) and dichloromethane (b)

**Table S5. Time constants for bi-exponential fit @ 710 nm for TBT transient absorption decays in hexane and dichloromethane**

| Solvent | TBT             |                |           |
|---------|-----------------|----------------|-----------|
|         | $\tau_1$        | $\tau_2$       | $A_{inf}$ |
| Hexane  | 67.5 ps (5.8%)  | 3.6 ns (56.2%) | 38%       |
| DCM     | 69.3 ps (14.8%) | 6.5 (59.7%)    | 25.5%     |

The energy of the charge transfer state is estimated calculated the Weller equation (eq. S-3).<sup>8-10</sup> In eq. S-1,  $E_{1/2ox}$  is the first oxidation potential of **T<sub>4</sub>** and **T<sub>8</sub>** and  $E_{1/2red}$  is the first reduction potential of **TBT**,  $r$  is the center-to-center distance of the (+) and (-) charges in the charge-separated state,  $e$  is the charge of an electron,  $\epsilon_0$  is the vacuum permittivity constant,  $\epsilon_s$  is the dielectric constant of of the solvent,  $r^+$  and  $r^-$  are the radii of the positive and negative ions, and  $\epsilon_{ref}$  is the reference solvent dielectric constant, DCM (8.93). The center-to-center distance and the radical ion radii are estimated from the DFT (B3LYP; 6-31/G (d, p)) optimized geometries.

$$E_{CT} = E_{1/2ox} - E_{1/2red} - e^2/4\pi\epsilon_0\epsilon_s r - e^2/8\pi\epsilon_0(1/r^+ + 1/r^-)(1/\epsilon_{ref} - 1/\epsilon_s) \quad (S-3)$$

### References for Supporting Information

1. Stalder, R.; Xie, D.; Zhou, R.; Xue, J.; Reynolds, J. R.; Schanze, K. S. Variable-Gap Conjugated Oligomers Grafted to CdSe Nanocrystals. *Chem. Mater.* **2012**, *24*, 3143-3152.
2. Lu, C.; Fujitsuka, M.; Majima, T. Photoaccelerated Hole Transfer in Oligothiophene Assemblies. *J. Phys. Chem. C* **2017**, *121*, 649-655.
3. Cekli, S.; Winkel, R. W.; Schanze, K. S. Effect of Oligomer Length on Photophysical Properties of Platinum Acetylde Donor- Acceptor-Donor Oligomers. *J. Phys. Chem. A* **2016**, *120*, 5512-5521.
4. Jones, A. L.; Schanze, K. S. Fluorescent Charge-Transfer Excited States in Acceptor Derivatized Thiophene Oligomers. *J. Phys. Chem. A* **2020**, *124*, 7001-7013.
5. Gallaher, J. K.; Chen, K.; Huff, G. S.; Prasad, S. K. K.; Gordon, K. C.; Hodgkiss, J. M. Evolution of Nonmirror Image Fluorescence Spectra in Conjugated Polymers and Oligomers. *J. Phys. Chem. Lett.* **2016**, *7*, 3307-3312.
6. Kanato, H.; Narutaki, M.; Takimiya, K.; Otsubo, T.; Harima, Y. Synthesis and Photovoltaic Properties of Tetrathiafulvalene–Oligothiophene–Fullerene Triads. *Chem. Lett.* **2006**, *35*, 668-669.
7. Mulherin, R. C.; Jung, S.; Huettner, S.; Johnson, K.; Kohn, P.; Sommer, M.; Allard, S.; Scherf, U.; Greenham, N. C. Ternary Photovoltaic Blends Incorporating an All-Conjugated Donor-Accept- or Diblock Copolymer. *Nano Lett.* **2011**, *11*, 4846-4851.
8. Weller, A. Photoinduced Electron Transfer in Solution: Exciplex and Radical Ion Pair Formation Free Enthalpies and Their Solvent Dependence. **1982**, *133*, 93-98.
9. Kroon, J.; Oevering, H.; Verhoeven, J. W.; Warman, J. M.; Oliver, A. M.; Paddon-Row, M. N. Temperature Effects on Intramolecular Electron Transfer Kinetics under "Normal", "Inverted", and "Nearly Optimal" Conditions. *J. Phys. Chem.* **1993**, *97*, 5065-5069.
10. Oevering, H.; Paddon-Row, M. N.; Heppener, M.; Oliver, A. M.; Cotsaris, E.; Verhoeven, J. W.; Hush, N. S. Long-Range Photoinduced through-Bond Electron Transfer and Radiative Recombination Via Rigid Nonconjugated Bridges: Distance and Solvent Dependence. *J. Am. Chem. Soc.* **1987**, *109*, 3258-3269.
